# Supplementary material for: Temporal and spatial differences in the vaginal microbiome of Chinese healthy women
Source: PeerJ. 2023 Dec 1;11:e16438. doi: 10.7717/peerj.16438 (PMC10695111; doi:10.7717/peerj.16438)
Supplement: Supplemental Information 4 [file peerj-11-16438-s004.xlsx]

## Sheet: S1
Table S1. In-house metagenomic sequencing statistics.
Sample number	Age	Period	Menstrual cycle (d)	Individual health status	Sampling date	Sequencing content
HPVP001A	27	follicular phase	25	Healthy	2021.7.5	Metagenome
HPVP001B	27	periovulatory phase	25	Healthy	2021.7.9	Metagenome
MV001A	27	follicular phase	25	Healthy	2021.8.2	Metagenome
MV001B	27	periovulatory phase	25	Healthy	2021.12.4	Metagenome
MV001C	27	luteal phase	25	Healthy	2021.12.13	Metagenome
HPVP002A	27	follicular phase	28	Healthy	2021.7.5	Metagenome
HPVP002B	27	periovulatory phase	28	Healthy	2021.7.9	Metagenome
HPVP002C	27	luteal phase	28	Healthy	2021.7.20	Metagenome
MV002A	27	follicular phase	28	Healthy	2021.10.27	Metagenome
MV002B	27	periovulatory phase	28	Healthy	2021.10.31	Metagenome
MV002C	27	luteal phase	28	Healthy	2021.11.11	Metagenome
HPVP003A	23	follicular phase	28	Healthy	2021.7.19	Metagenome
HPVP003B	23	periovulatory phase	28	Healthy	2021.7.29	Metagenome
HPVP003C	23	luteal phase	28	Healthy	2021.8.8	Metagenome
MV003A	23	follicular phase	28	Healthy	2021.8.26	Metagenome
MV003B	23	periovulatory phase	28	Healthy	2021.7.29	Metagenome
MV003C	23	luteal phase	28	Healthy	2021.8.8	Metagenome
HPVP004A	28	follicular phase	28	Healthy	2021.8.11	Metagenome
HPVP004B	28	periovulatory phase	28	Healthy	2021.8.20	Metagenome
HPVP004C	28	luteal phase	28	Healthy	2021.8.30	Metagenome
MV004A	28	follicular phase	28	Healthy	2021.8.11	Metagenome
MV004B	28	periovulatory phase	28	Healthy	2021.8.20	Metagenome
MV004C	28	luteal phase	28	Healthy	2021.8.30	Metagenome
MV007A	30	follicular phase	30	Healthy	2021.8.13	Metagenome
MV007B	30	periovulatory phase	30	Healthy	2021.8.24	Metagenome
MV007C	30	luteal phase	30	Healthy	2021.9.3	Metagenome
HPVP008A	21	follicular phase	30	Healthy	2021.10.15	Metagenome
HPVP008B	21	periovulatory phase	30	Healthy	2021.10.21	Metagenome
HPVP008C	21	luteal phase	30	Healthy	2021.11.2	Metagenome
MV008A	21	follicular phase	30	Healthy	2021.10.15	Metagenome
MV008B	21	periovulatory phase	30	Healthy	2021.10.21	Metagenome
MV008C	21	luteal phase	30	Healthy	2021.11.2	Metagenome
MV009A	22	follicular phase	30	Healthy	2021.10.29	Metagenome
MV009B	22	periovulatory phase	30	Healthy	2021.11.12	Metagenome
MV009C	22	luteal phase	30	Healthy	2021.11.24	Metagenome
HPVP010A	22	follicular phase	28	Healthy	2021.12.8	Metagenome
HPVP010B	22	periovulatory phase	28	Healthy	2021.12.14	Metagenome
HPVP010C	22	luteal phase	28	Healthy	2021.12.23	Metagenome
MV010A	22	follicular phase	28	Healthy	2021.12.8	Metagenome
MV010B	22	periovulatory phase	28	Healthy	2021.12.14	Metagenome
MV010C	22	luteal phase	28	Healthy	2021.12.23	Metagenome
HPVP011A	27	follicular phase	30	Healthy	2021.12.7	Metagenome
HPVP011B	27	periovulatory phase	30	Healthy	2021.12.16	Metagenome
HPVP011C	27	luteal phase	30	Healthy	2022.3.22	Metagenome
MV011A	27	follicular phase	30	Healthy	2021.12.7	Metagenome
MV011B	27	periovulatory phase	30	Healthy	2021.12.16	Metagenome
MV011C	27	luteal phase	30	Healthy	2022.3.22	Metagenome
HPVP013A	23	follicular phase	33	Healthy	2021.12.16	Metagenome
HPVP013B	23	periovulatory phase	33	Healthy	2021.12.23	Metagenome
HPVP013C	23	luteal phase	33	Healthy	2022.1.4	Metagenome
MV013A	23	follicular phase	33	Healthy	2021.12.16	Metagenome
MV013B	23	periovulatory phase	33	Healthy	2021.12.23	Metagenome
MV013C	23	luteal phase	33	Healthy	2022.1.4	Metagenome
HPVP014A	23	follicular phase	29	Healthy	2021.12.23	Metagenome
HPVP014B	23	periovulatory phase	29	Healthy	2021.12.28	Metagenome
HPVP014C	23	luteal phase	29	Healthy	2022.1.6	Metagenome
MV014A	23	follicular phase	29	Healthy	2021.12.23	Metagenome
MV014B	23	periovulatory phase	29	Healthy	2021.12.28	Metagenome
MV014C	23	luteal phase	29	Healthy	2022.1.6	Metagenome
HPVP03A-v	23	follicular phase	28	Healthy	2022.3.1	virome
HPVP03B-v	23	periovulatory phase	28	Healthy	2021.12.16	virome
HPVP03C-v	23	luteal phase	28	Healthy	2021.12.23	virome
HPVP08B-v	21	periovulatory phase	30	Healthy	2021.12.14	virome
HPVP10A-v	22	follicular phase	28	Healthy	2022.1.5	virome
HPVP10B-v	22	periovulatory phase	28	Healthy	2021.12.14	virome
HPVP10C-v	22	luteal phase	28	Healthy	2021.12.23	virome
HPVP11A-v	27	follicular phase	30	Healthy	2021-12-07	virome
HPVP11B-v	27	periovulatory phase	30	Healthy	2021.12.16	virome
HPVP11C-v	27	luteal phase	30	Healthy	2022.3.22	virome
HPVP13B-v	23	periovulatory phase	33	Healthy	2021.12.23	virome
HPVP13C-v	23	luteal phase	33	Healthy	2022.1.4	virome
HPVP14A-v	23	follicular phase	29	Healthy	2021.12.23	virome
HPVP14B-v	23	periovulatory phase	29	Healthy	2021.12.28	virome
HPVP14C-v	23	luteal phase	29	Healthy	2022.1.6	virome

## Sheet: S2
Table S2. Public datasets metagenomic sequencing statistics.
Run	Sample number	Age	Sampling site	Instrument	Assay Type	Sampling area	BioProject	geo_loc_name_country	geo_loc_name_country_continent
SRR10258541	HZ01	27-42	cervical orifice	HiSeq X Ten	WGS	Hangzhou	PRJNA576566	China	Asia
SRR10258542	HZ02	27-42	cervical orifice	HiSeq X Ten	WGS	Hangzhou	PRJNA576566	China	Asia
SRR10258543	HZ03	27-42	cervical orifice	HiSeq X Ten	WGS	Hangzhou	PRJNA576566	China	Asia
SRR10258546	HZ04	27-42	cervical orifice	HiSeq X Ten	WGS	Hangzhou	PRJNA576566	China	Asia
SRR10258548	HZ05	27-42	cervical orifice	HiSeq X Ten	WGS	Hangzhou	PRJNA576566	China	Asia
SRR10258550	HZ06	27-42	cervical orifice	HiSeq X Ten	WGS	Hangzhou	PRJNA576566	China	Asia
SRR10258551	HZ07	27-42	cervical orifice	HiSeq X Ten	WGS	Hangzhou	PRJNA576566	China	Asia
SRR10258552	HZ08	27-42	cervical orifice	HiSeq X Ten	WGS	Hangzhou	PRJNA576566	China	Asia
SRR10258553	HZ09	27-42	cervical orifice	HiSeq X Ten	WGS	Hangzhou	PRJNA576566	China	Asia
SRR10258554	HZ10	27-42	cervical orifice	HiSeq X Ten	WGS	Hangzhou	PRJNA576566	China	Asia
SRR10258555	HZ11	27-42	cervical orifice	HiSeq X Ten	WGS	Hangzhou	PRJNA576566	China	Asia
SRR10258558	HZ12	27-42	cervical orifice	HiSeq X Ten	WGS	Hangzhou	PRJNA576566	China	Asia
SRR10258560	HZ13	27-42	cervical orifice	HiSeq X Ten	WGS	Hangzhou	PRJNA576566	China	Asia
SRR10258561	HZ14	27-42	cervical orifice	HiSeq X Ten	WGS	Hangzhou	PRJNA576566	China	Asia
SRR10258563	HZ15	27-42	cervical orifice	HiSeq X Ten	WGS	Hangzhou	PRJNA576566	China	Asia
SRR10258565	HZ16	27-42	cervical orifice	HiSeq X Ten	WGS	Hangzhou	PRJNA576566	China	Asia
SRR10258566	HZ17	27-42	cervical orifice	HiSeq X Ten	WGS	Hangzhou	PRJNA576566	China	Asia
SRR10258567	HZ18	27-42	cervical orifice	HiSeq X Ten	WGS	Hangzhou	PRJNA576566	China	Asia
SRR10258568	HZ19	27-42	cervical orifice	HiSeq X Ten	WGS	Hangzhou	PRJNA576566	China	Asia
SRR10258569	HZ20	27-42	cervical orifice	HiSeq X Ten	WGS	Hangzhou	PRJNA576566	China	Asia
SRR10258570	HZ21	27-42	cervical orifice	HiSeq X Ten	WGS	Hangzhou	PRJNA576566	China	Asia
SRR10258571	HZ22	27-42	cervical orifice	HiSeq X Ten	WGS	Hangzhou	PRJNA576566	China	Asia
SRR10258572	HZ23	27-42	cervical orifice	HiSeq X Ten	WGS	Hangzhou	PRJNA576566	China	Asia
SRR10258573	HZ24	27-42	cervical orifice	HiSeq X Ten	WGS	Hangzhou	PRJNA576566	China	Asia
SRR10258575	HZ25	27-42	cervical orifice	HiSeq X Ten	WGS	Hangzhou	PRJNA576566	China	Asia
ERR2238774	SZ01	35	cervical mucus	Illumina HiSeq 2000	WGS	Shenzhen	PRJEB24147	China	Asia
ERR2238775	SZ02	33	cervical mucus	Illumina HiSeq 2000	WGS	Shenzhen	PRJEB24147	China	Asia
ERR2244423	SZ03	40	cervical mucus	Illumina HiSeq 2000	WGS	Shenzhen	PRJEB24147	China	Asia
ERR2244501	SZ04	37	cervical mucus	Illumina HiSeq 2000	WGS	Shenzhen	PRJEB24147	China	Asia
ERR2244503	SZ05	38	cervical mucus	Illumina HiSeq 2000	WGS	Shenzhen	PRJEB24147	China	Asia
ERR2244505	SZ06	38	cervical mucus	Illumina HiSeq 2000	WGS	Shenzhen	PRJEB24147	China	Asia
ERR2244507	SZ07	29	cervical mucus	Illumina HiSeq 2000	WGS	Shenzhen	PRJEB24147	China	Asia
ERR2244509	SZ08	36	cervical mucus	Illumina HiSeq 2000	WGS	Shenzhen	PRJEB24147	China	Asia
ERR2244511	SZ09	24	cervical mucus	Illumina HiSeq 2000	WGS	Shenzhen	PRJEB24147	China	Asia
ERR2244513	SZ10	33	cervical mucus	Illumina HiSeq 2000	WGS	Shenzhen	PRJEB24147	China	Asia
ERR2244516	SZ11	23	cervical mucus	Illumina HiSeq 2000	WGS	Shenzhen	PRJEB24147	China	Asia
ERR2244518	SZ12	22	cervical mucus	Illumina HiSeq 2000	WGS	Shenzhen	PRJEB24147	China	Asia
ERR2244520	SZ13	26	cervical mucus	Illumina HiSeq 2000	WGS	Shenzhen	PRJEB24147	China	Asia
ERR2244522	SZ14	28	cervical mucus	Illumina HiSeq 2000	WGS	Shenzhen	PRJEB24147	China	Asia
ERR2244524	SZ15	26	cervical mucus	Illumina HiSeq 2000	WGS	Shenzhen	PRJEB24147	China	Asia
ERR2244526	SZ16	26	cervical mucus	Illumina HiSeq 2000	WGS	Shenzhen	PRJEB24147	China	Asia
ERR2244528	SZ17	26	cervical mucus	Illumina HiSeq 2000	WGS	Shenzhen	PRJEB24147	China	Asia
ERR2244530	SZ18	36	cervical mucus	Illumina HiSeq 2000	WGS	Shenzhen	PRJEB24147	China	Asia
ERR2244532	SZ19	34	cervical mucus	Illumina HiSeq 2000	WGS	Shenzhen	PRJEB24147	China	Asia
ERR2244534	SZ20	26	cervical mucus	Illumina HiSeq 2000	WGS	Shenzhen	PRJEB24147	China	Asia
ERR2244536	SZ21	27	cervical mucus	Illumina HiSeq 2000	WGS	Shenzhen	PRJEB24147	China	Asia
ERR2244538	SZ22	29	cervical mucus	Illumina HiSeq 2000	WGS	Shenzhen	PRJEB24147	China	Asia
ERR2244540	SZ23	25	cervical mucus	Illumina HiSeq 2000	WGS	Shenzhen	PRJEB24147	China	Asia
ERR2244542	SZ24	25	cervical mucus	Illumina HiSeq 2000	WGS	Shenzhen	PRJEB24147	China	Asia
ERR2244545	SZ25	25	cervical mucus	Illumina HiSeq 2000	WGS	Shenzhen	PRJEB24147	China	Asia
ERR2244548	SZ26	26	cervical mucus	Illumina HiSeq 2000	WGS	Shenzhen	PRJEB24147	China	Asia
ERR2244551	SZ27	35	cervical mucus	Illumina HiSeq 2000	WGS	Shenzhen	PRJEB24147	China	Asia
ERR2244556	SZ28	26	cervical mucus	Illumina HiSeq 2000	WGS	Shenzhen	PRJEB24147	China	Asia
ERR2244560	SZ29	25	cervical mucus	Illumina HiSeq 2000	WGS	Shenzhen	PRJEB24147	China	Asia
ERR2244565	SZ30	25	cervical mucus	Illumina HiSeq 2000	WGS	Shenzhen	PRJEB24147	China	Asia
